# Supplementary material for: From Free Binding Energy Calculations of SARS-CoV-2—Receptor Interactions to Cellular Immune Responses
Source: MDPI journal article supplement (doi:10.3390/medicina58020226), 2022-02-02
Supplement: s1 [file s1]

# From Free Binding Energy Calculations of SARS-CoV-2 – Receptor Interactions to Cellular Immune Responses

Michael O. Glocker <sup>1,\*</sup>, Kwabena F.M. Opuni <sup>2</sup>, and Hans-Juergen Thiesen <sup>3,4</sup>

<sup>1</sup>Proteome Center Rostock, University Medicine Rostock and University of Rostock, Schillingallee 69,  
18059 Rostock, Germany

<sup>2</sup>Department of Pharmaceutical Chemistry, School of Pharmacy, College of Health Science,  
University of Ghana, P. O. Box LG43 Legon, Ghana

<sup>3</sup>Institute of Immunology, University Medicine Rostock, Schillingallee 70, 18059 Rostock, Germany

<sup>4</sup>Gesellschaft für Individualisierte Medizin mbH (IndyMed), Industriestrasse 15, 18069 Rostock, Germany

## Supplement

### **\*Corresponding author**

Prof. Dr. Michael O. Glocker  
Proteome Center Rostock  
University Rostock Medical Center and Natural Science Faculty  
University of Rostock  
Schillingallee 69  
18057 Rostock  
Germany  
Phone: +49 - 381 - 494 4930  
FAX: +49 - 381 - 494 4932  
e-mail: michael.glocker@med.uni-rostock.de  
URL: <https://pzs.med.uni-rostock.de>

## Methods

### *Visualization of 3D protein structures*

The coordinates of all non-hydrogen atoms of SARS-CoV-1 wildtype (wt) RBM plus human angiotensin converting enzyme 2 (hACE2) receptor (PDB ID 2AJF) (1) were downloaded from the RCSB Protein Data Bank ([www.rcsb.org](http://www.rcsb.org)). A new PDB file that contained only the atom coordinates of SARS-CoV-1 wt RBM was generated by editing the 2AJF PDB file using a word processing program and opening the PDB file as a text file. Then all of the lines that contained the coordinates of the atoms from the hACE2 receptor components were deleted. The process was repeated for the SARS-CoV-2 wt RBM plus hACE2 receptor (PDB ID 6MOJ; represents UniProt P0DTC2, Genbank MN908947.3, and EPI\_ISL:402125) (2). The 3D structure of SARS-CoV-2 Omicron RBD was modeled by alphafold (<https://colab.research.google.com/github/sokrypton/ColabFold/blob/main/AlphaFold2.ipynb#scrollTo=G4yBrceuFbf3>) (3) using the amino acid sequences of the SARS-CoV-2 Omicron RBD (EPI\_ISL\_6640916) that was obtained from the GitHub homepage (<https://github.com/cov-lineages/pango-designation/issues/343>). Visualization of the protein structures was done using the UCSF Chimera (<http://www.cgl.ucsf.edu/chimera/>) molecular visualization software (4).

### *Calculation of binding energy changes of SARS-CoV-2-derived RBMs (wt vs. Alpha or Delta or Omicron) when bound to human ACE2 or human DPP-IV*

The binding energy changes between the SARS-CoV-2 wt RBM (UniProt P0DTC2, Genbank MN908947.3, EPI\_ISL:402125) and the hACE2 receptor complex upon site-specific exchanges of amino acid residues from the SARS-CoV-2 wt RBM were performed using the BeAtMuSiC web server (<http://babylone.ulb.ac.be/beatmusic/query.php>) (5). The PDB file of the SARS-CoV-2 wt RBM and hACE2 receptor complex (PDB ID: 6MOJ) served as the input file. The SARS-CoV-2 wt RBM and hACE2 receptor were selected as the two binding partners. The server automatically performed systematic mutations of interface residues of the atoms belonging to the SARS-CoV-2 wt RBM. The procedure was repeated using the SARS-CoV-2 wt RBM and hDPP-IV receptor complex. The SARS-CoV-2 wt RBM and hDPP-IV receptor complex was generated by replacing the hACE2 receptor of the SARS-CoV-2 wt RBM and hACE2 receptor complex (PDB ID: 6MOJ) with the hDPP-IV receptor from the MERS and hDPP-IV receptor complex (PDB ID: 4L72) using Chimera's "matchmake" operation procedure.

### *HLA-binding prediction of SARS-CoV-2 Omicron variants*

The spike protein amino acid sequences of five SARS-CoV-2 variants (EPI\_ISL\_402125, EPI\_ISL\_6640916, EPI\_ISL\_8414412, EPI\_ISL\_8449977, EPI\_ISL\_8546808) were split into 9-mer peptides. The binding affinities of these 9-mer peptides were subjected to analyses of binding with the 10 most abundant HLA-types using the NetMHC 4.0 Webservice: <https://services.healthtech.dtu.dk/service.php?NetMHC-4.0> (6-9).

### *Literature References (Methods)*

- (1) Li F, Li W, Farzan M, Harrison SC. Structure of SARS Coronavirus Spike Receptor-Binding Domain Complexed with Receptor. *Science* 2005; 390: 1864-1868. doi: 10.1126/science.1116480
- (2) 1. Lan, J.; Ge, J.; Yu, J.; Shan, S.; Zhou, H.; Fan, S.; Zhang, Q.; Shi, X.; Wang, Q.; Zhang, L.; et al. Structure of the SARS-CoV-2 spike receptor-binding domain bound to the ACE2 receptor. *Nature* 2020, 581, 215–221. <https://doi.org/10.1038/s41586-020-2180-5>.
- (3) 5. Jumper, J.; Evans, R.; Pritzel, A.; Green, T.; Figurnov, M.; Ronneberger, O.; Tunyasuvunakool, K.; Bates, R.; Židek, A.; Potapenko, A.; et al. Highly accurate protein structure prediction with AlphaFold. *Nature* 2021, 596, 583–589. <https://doi.org/10.1038/s41586-021-03819-2>.
- (4) Pettersen, E.F.; Goddard, T.D.; Huang, C.C.; Couch, G.S.; Greenblatt, D.M.; Meng, E.C.; Ferrin, T.E. UCSF Chimera—A visualization system for exploratory research and analysis. *J. Comput. Chem.* 2004, 25, 1605–1612. <https://doi.org/10.1002/jcc.20084>
- (5) Dehouck, Y.; Kwasigroch, J.M.; Rooman, M.; Gilis, D. BeAtMuSiC: Prediction of changes in protein–protein binding affinity on mutations. *Nucleic Acids Res.* 2013, 41, W333–W339, <https://doi.org/10.1093/nar/gkt450>.

- (6) Andreatta M, Nielsen M. Gapped sequence alignment using artificial neural networks: application to the MHC class I system. *Bioinformatics*. 2016 Feb 15;32(4):511-7. Epub 2015 Oct 29.
- (7) Lundegaard C, Lamberth K, Harndahl M, Buus S, Lund O, Nielsen M. NetMHC-3.0: accurate web accessible predictions of human, mouse and monkey MHC class I affinities for peptides of length 8-11. *Nucleic Acids Res*. 2008 Jul 1;36(Web Server issue):W509-12. Epub 2008 May 7.
- (8) Buus S, Lauemøller SL, Wornig P, Kesmir C, Frimurer T, Corbet S, Fomsgaard A, Hilden J, Holm A, Brunak S. Sensitive quantitative predictions of peptide-MHC binding by a 'Query by Committee' artificial neural network approach. *Tissue Antigens*. 2003 Nov;62(5):378-84.
- (9) Nielsen M, Lundegaard C, Wornig P, Lauemøller SL, Lamberth K, Buus S, Brunak S, Lund O. Reliable prediction of T-cell epitopes using neural networks with novel sequence representations. *Protein Sci*. 2003 May;12(5):1007-17.

## Supplementary Figures

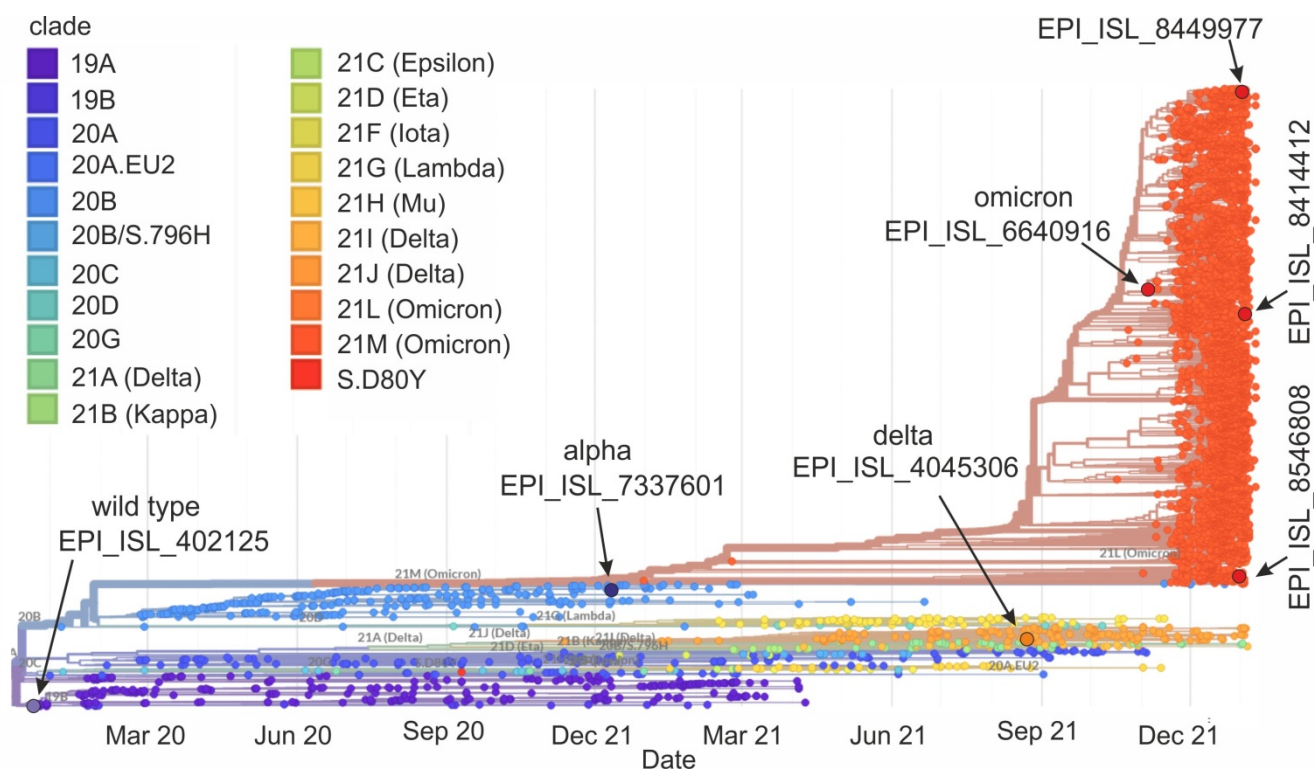

**Figure S1.** Phylogeny tree of SARS-CoV-2 strains. Clades are color coded. Locations of SARS-CoV-2 wt strain (EPI-ISL\_402125) from Wuhan (GenBank: MN908947.3; spike protein UniProt P0DTC2), SARS-CoV-2  $\alpha$  strain from South Africa (EPI\_ISL\_7337601), SARS-CoV-2  $\delta$  strain from Germany (EPI\_ISL\_4045306), SARS-CoV-2  $\omicron$  strain from Botswana (EPI\_ISL\_6640916), SARS-CoV-2  $\omicron$  strain from Israel (EPI\_ISL\_8546808), SARS-CoV-2  $\omicron$  strain from Germany (EPI\_ISL\_8414412), and SARS-CoV-2  $\omicron$  strain from Singapore (EPI\_ISL\_8449977) are shown. Obtained from: <https://nextstrain.org/groups/neherlab/ncov/21K.Omicron?r=location>

## Supplementary Tables

**Table S1:** Effects of SARS-CoV-2 RBD-exchanged amino acid residues on strengths of interaction with hACE2. <sup>a)</sup>

| amino acid<br>residues in<br>wt RBD <sup>b)</sup> | $\Delta\Delta G$ values in kcal / mol |       |       |            |            |            |       |       |            |            |       |            |       |            |       |       |            |            |       |            |
|---------------------------------------------------|---------------------------------------|-------|-------|------------|------------|------------|-------|-------|------------|------------|-------|------------|-------|------------|-------|-------|------------|------------|-------|------------|
|                                                   | A                                     | C     | D     | E          | F          | G          | H     | I     | K          | L          | M     | N          | P     | Q          | R     | S     | T          | V          | W     | Y          |
| K417                                              | +1.01                                 | +0.83 | +0.38 | +0.51      | +0.11      | +0.74      | +0.05 | +0.28 | $\pm 0.00$ | -0.00      | -0.23 | +0.49      | +0.18 | +0.47      | +0.23 | +0.87 | +0.51      | +0.79      | -0.24 | -0.10      |
| G446                                              | +1.27                                 | +0.93 | +1.05 | +1.44      | +1.17      | $\pm 0.00$ | +0.89 | +1.55 | +1.22      | +1.37      | +1.33 | +0.79      | +1.49 | +1.27      | +1.13 | +1.05 | +1.32      | +1.32      | +1.27 | +1.11      |
| G447                                              | +0.94                                 | +0.92 | +1.20 | +1.40      | +0.96      | $\pm 0.00$ | +0.84 | +1.01 | +1.22      | +1.09      | +0.88 | +1.03      | +1.15 | +1.09      | +1.08 | +1.01 | +1.04      | +1.08      | +0.79 | +0.97      |
| Y449                                              | +0.98                                 | +1.04 | +0.74 | +0.95      | +0.36      | +0.89      | +0.46 | +0.63 | +0.76      | +0.59      | +0.63 | +0.64      | +0.59 | +0.83      | +0.74 | +0.84 | +0.73      | +0.65      | +0.26 | $\pm 0.00$ |
| Y453                                              | +1.81                                 | +0.42 | +1.72 | +1.54      | +0.31      | +1.95      | +0.78 | +0.64 | +1.48      | +0.76      | +0.85 | +1.42      | +1.59 | +1.40      | +1.16 | +1.65 | +1.30      | +0.71      | +0.30 | $\pm 0.00$ |
| L455                                              | +1.62                                 | +0.33 | +2.09 | +1.96      | -0.14      | +1.89      | +0.61 | +0.13 | +1.69      | $\pm 0.00$ | +0.55 | +1.88      | +1.06 | +1.55      | +0.93 | +1.58 | +1.31      | +0.39      | -0.07 | -0.22      |
| F456                                              | +2.18                                 | +1.49 | +1.85 | +1.94      | $\pm 0.00$ | +2.45      | +1.20 | +1.09 | +1.61      | +1.25      | +1.30 | +1.83      | +2.51 | +1.68      | +1.17 | +2.12 | +1.66      | +1.32      | +0.52 | +0.57      |
| Y473                                              | +1.03                                 | +0.87 | +0.81 | +1.04      | +0.38      | +1.17      | +0.68 | +0.58 | +0.97      | +0.62      | +0.51 | +0.82      | +0.53 | +0.87      | +0.63 | +0.92 | +0.78      | +0.76      | +0.46 | $\pm 0.00$ |
| A475                                              | $\pm 0.00$                            | +0.06 | +1.42 | +1.58      | -0.32      | +0.91      | +0.45 | +0.07 | +1.07      | +0.17      | +0.19 | +0.86      | +0.63 | +0.71      | +0.74 | +0.62 | +0.54      | +0.14      | -0.30 | -0.27      |
| G476                                              | +0.70                                 | +0.30 | +0.50 | +0.81      | +0.08      | $\pm 0.00$ | +0.19 | +0.44 | +0.63      | +0.47      | +0.29 | +0.37      | +1.03 | +0.59      | +0.52 | +0.50 | +0.44      | +0.40      | +0.17 | +0.23      |
| E484                                              | +0.10                                 | -0.04 | +0.07 | $\pm 0.00$ | -0.09      | +0.43      | +0.07 | -0.15 | +0.07      | +0.01      | +0.09 | +0.09      | -0.43 | +0.22      | +0.10 | +0.06 | -0.04      | -0.16      | -0.12 | -0.07      |
| F486                                              | +1.68                                 | +1.60 | +1.48 | +1.34      | $\pm 0.00$ | +1.89      | +0.84 | +0.90 | +1.08      | +0.74      | +0.85 | +1.33      | +0.81 | +1.20      | +0.95 | +1.46 | +1.23      | +0.93      | +0.31 | +0.50      |
| N487                                              | +1.13                                 | +0.19 | +0.97 | +1.19      | +0.02      | +0.75      | +0.18 | +0.51 | +1.08      | +0.39      | +0.25 | $\pm 0.00$ | +1.16 | +0.69      | +0.60 | +1.03 | +0.80      | +0.35      | +0.23 | -0.24      |
| Y489                                              | +2.82                                 | +2.59 | +2.79 | +2.20      | +1.38      | +3.43      | +1.74 | +1.93 | +1.98      | +2.01      | +1.68 | +2.58      | +2.84 | +1.97      | +1.85 | +2.87 | +2.47      | +2.36      | +0.84 | $\pm 0.00$ |
| Q493                                              | +1.52                                 | +0.83 | +1.46 | +1.36      | +0.10      | +1.84      | +0.42 | +0.56 | +0.97      | +0.45      | +0.57 | +1.15      | +1.36 | $\pm 0.00$ | +0.60 | +2.02 | +1.10      | +0.71      | -0.08 | +0.15      |
| G496                                              | +0.63                                 | +0.02 | +0.80 | +1.05      | +0.15      | $\pm 0.00$ | +0.33 | +0.41 | +1.12      | +0.58      | +0.40 | +0.67      | +1.11 | +0.78      | +0.71 | +0.44 | +0.41      | +0.22      | +0.18 | +0.21      |
| Q498                                              | +0.75                                 | -0.38 | +1.12 | +1.64      | -0.27      | +0.98      | +0.26 | -0.37 | +1.46      | -0.49      | -0.28 | +0.80      | +1.26 | $\pm 0.00$ | +0.84 | +0.74 | +0.19      | -0.01      | -0.25 | -0.26      |
| T500                                              | +1.62                                 | +1.57 | +1.08 | +1.93      | +0.36      | +2.30      | +0.91 | +0.80 | +1.74      | +0.40      | +0.46 | +1.01      | +1.75 | +1.47      | +0.99 | +1.38 | $\pm 0.00$ | +0.83      | +0.05 | +0.09      |
| N501                                              | +0.88                                 | +0.46 | +0.80 | +0.77      | -0.09      | +1.24      | +0.33 | +0.23 | +0.46      | +0.06      | -0.18 | $\pm 0.00$ | +1.19 | +0.56      | +0.43 | +1.25 | +0.42      | +0.20      | -0.08 | -0.08      |
| G502                                              | +1.21                                 | +0.91 | +1.38 | +2.16      | -0.51      | $\pm 0.00$ | +0.04 | +0.87 | +1.24      | +0.51      | +0.41 | +1.05      | +0.97 | +1.20      | +0.65 | +1.23 | +1.09      | +0.99      | -0.49 | -0.28      |
| V503                                              | +0.34                                 | +0.42 | +0.08 | +0.42      | +0.45      | +0.41      | +0.16 | +0.29 | +0.39      | +0.26      | +0.28 | +0.12      | +0.04 | +0.36      | +0.17 | +0.09 | +0.11      | $\pm 0.00$ | +0.14 | +0.44      |
| Y505                                              | +1.78                                 | +1.83 | +1.74 | +1.85      | +0.86      | +2.51      | +1.09 | +1.45 | +1.82      | +1.24      | +1.14 | +1.54      | +1.94 | +1.24      | +1.09 | +1.80 | +1.71      | +1.95      | +0.13 | $\pm 0.00$ |

a) no cumulative effects; free energy difference calculations for individual amino acid positions.

b) residues with a shortest atom distance below 5 Å between RBD and hACE2.

**Table S2:** Effects of SARS-CoV-2 RBD-exchanged amino acid residues on strengths of interaction with hDPP-IV. <sup>a)</sup>

| amino acid<br>residues in<br>wt RBD <sup>b)</sup> | $\Delta\Delta G$ values in kcal / mol |            |            |            |            |            |       |            |            |            |       |            |            |            |            |            |            |            |       |            |
|---------------------------------------------------|---------------------------------------|------------|------------|------------|------------|------------|-------|------------|------------|------------|-------|------------|------------|------------|------------|------------|------------|------------|-------|------------|
|                                                   | A                                     | C          | D          | E          | F          | G          | H     | I          | K          | L          | M     | N          | P          | Q          | R          | S          | T          | V          | W     | Y          |
| R403                                              | +0.77                                 | +0.31      | +0.67      | +0.58      | +0.20      | +0.99      | +0.02 | +0.24      | +0.58      | +0.31      | +0.29 | +0.63      | +0.25      | +0.49      | $\pm 0.00$ | +0.64      | +0.38      | +0.53      | +0.11 | +0.31      |
| D405                                              | +0.43                                 | +0.45      | $\pm 0.00$ | +0.31      | -0.10      | +0.57      | -0.06 | +0.025     | +0.32      | +0.26      | +0.20 | +0.08      | +0.27      | +0.20      | +0.26      | +0.21      | +0.23      | +0.43      | -0.14 | +0.05      |
| E406                                              | +0.07                                 | +0.69      | +0.64      | $\pm 0.00$ | +0.02      | +0.78      | +0.08 | +0.50      | +0.72      | +0.27      | +0.16 | +0.43      | +1.13      | +0.47      | +0.38      | +0.67      | +0.61      | +0.39      | +0.19 | -0.01      |
| R408                                              | +0.53                                 | +0.35      | +0.11      | +0.19      | -0.11      | +0.51      | -0.13 | +0.46      | +0.16      | +0.07      | +0.03 | -0.04      | +0.11      | +0.18      | $\pm 0.00$ | +0.23      | +0.13      | +0.73      | +0.17 | +0.12      |
| Q409                                              | +1.05                                 | +0.64      | +0.64      | +0.62      | +0.06      | +0.66      | +0.11 | +0.23      | +0.47      | +0.39      | +0.38 | +0.48      | +0.81      | $\pm 0.00$ | +0.47      | +0.64      | +0.67      | +0.55      | +0.23 | +0.07      |
| T415                                              | +1.03                                 | +0.83      | +0.91      | +1.21      | +0.58      | +1.15      | +0.46 | +0.66      | +0.98      | +0.70      | +0.85 | +0.75      | +1.13      | +0.76      | +0.71      | +0.73      | $\pm 0.00$ | +0.60      | +0.59 | +0.69      |
| G416                                              | +0.75                                 | +0.34      | +0.74      | +1.49      | +0.44      | $\pm 0.00$ | +0.46 | +0.58      | +1.38      | +0.68      | +0.55 | +1.03      | +1.02      | +1.15      | +0.73      | +0.76      | +0.84      | +0.74      | +0.42 | +0.38      |
| K417                                              | +1.44                                 | +0.49      | +0.69      | +0.44      | -0.32      | +0.92      | +0.02 | +0.15      | $\pm 0.00$ | +0.07      | +0.10 | +0.64      | +0.45      | +0.50      | +0.46      | +1.23      | +0.91      | +0.90      | -0.34 | -0.18      |
| L455                                              | +1.17                                 | +0.56      | +1.30      | +1.16      | +0.37      | +1.54      | +0.64 | +0.40      | +0.99      | $\pm 0.00$ | +0.61 | +1.26      | +0.74      | +0.91      | +1.04      | +1.04      | +0.91      | +0.54      | +0.56 | +0.39      |
| F456                                              | +2.41                                 | +1.46      | +2.15      | +2.31      | $\pm 0.00$ | +2.56      | +1.42 | +1.09      | +1.90      | +1.09      | +1.39 | +1.84      | +2.50      | +1.85      | +1.65      | +2.19      | +1.74      | +1.24      | +0.60 | +0.75      |
| I472                                              | +1.07                                 | +0.64      | +1.28      | +1.30      | +0.29      | +1.12      | +0.69 | $\pm 0.00$ | +1.08      | +0.32      | +0.55 | +0.96      | +0.51      | +1.10      | +0.90      | +1.06      | +0.77      | +0.41      | +0.40 | +0.53      |
| Y473                                              | +1.33                                 | +1.00      | +1.31      | +1.48      | +0.41      | +1.50      | +0.88 | +0.55      | +1.22      | +0.63      | +0.53 | +1.17      | +0.90      | +1.15      | +0.87      | +1.24      | +0.94      | +0.63      | +0.51 | $\pm 0.00$ |
| Q474                                              | +0.14                                 | -0.01      | +0.20      | +0.38      | -0.58      | +0.11      | -0.26 | -0.35      | +0.27      | -0.53      | -0.12 | +0.16      | -0.27      | $\pm 0.00$ | -0.18      | +0.19      | +0.18      | -0.27      | -0.37 | -0.36      |
| A475                                              | $\pm 0.00$                            | -0.12      | +1.93      | +1.89      | -1.14      | +1.15      | +0.25 | -0.05      | +1.07      | -0.09      | -0.23 | +1.35      | +1.20      | +1.10      | +0.56      | +1.05      | +0.91      | +0.30      | -1.26 | -1.14      |
| G476                                              | +0.58                                 | -0.88      | +0.75      | +1.40      | -1.61      | $\pm 0.00$ | -0.81 | -0.69      | +1.16      | -0.41      | -0.59 | +0.40      | +1.11      | +0.63      | +0.14      | +0.22      | +0.23      | -0.51      | -0.99 | -0.98      |
| S477                                              | +0.14                                 | -0.03      | +0.36      | +0.59      | +0.32      | +0.33      | +0.28 | +0.20      | +0.56      | +0.21      | +0.21 | +0.39      | -0.11      | +0.42      | +0.47      | $\pm 0.00$ | +0.13      | +0.15      | +0.36 | +0.36      |
| T478                                              | +0.31                                 | +0.28      | +0.55      | +1.05      | +0.15      | +0.60      | +0.16 | +0.02      | +1.00      | -0.02      | +0.08 | +0.44      | +0.36      | +0.65      | +0.69      | +0.17      | $\pm 0.00$ | -0.14      | +0.51 | +0.38      |
| P479                                              | +0.25                                 | +0.35      | +0.19      | +0.41      | +0.51      | +0.50      | +0.30 | +0.26      | +0.41      | +0.29      | +0.38 | +0.26      | $\pm 0.00$ | +0.37      | +0.36      | +0.14      | +0.14      | +0.25      | +0.50 | +0.38      |
| C480                                              | +0.38                                 | $\pm 0.00$ | +0.60      | +0.67      | +0.14      | +0.89      | +0.43 | +0.16      | 0.49       | +0.17      | +0.26 | +0.71      | +0.46      | +0.53      | +0.47      | +0.36      | +0.43      | +0.33      | +0.13 | +0.08      |
| V483                                              | +0.41                                 | +0.16      | +0.53      | +0.24      | +0.31      | +0.54      | +0.23 | +0.05      | +0.14      | +0.20      | +0.17 | +0.36      | +0.87      | +0.11      | +0.19      | +0.37      | +0.15      | $\pm 0.00$ | +0.44 | +0.35      |
| E484                                              | -0.20                                 | -0.21      | 0.06       | $\pm 0.00$ | -0.32      | +0.36      | -0.08 | -0.34      | -0.05      | -0.40      | -0.22 | -0.02      | -0.22      | -0.03      | -0.11      | 0.00       | -0.01      | -0.25      | -0.27 | -0.22      |
| G485                                              | +1.24                                 | +0.45      | +0.83      | +1.28      | -0.00      | $\pm 0.00$ | +0.45 | +0.45      | +0.80      | +0.33      | +0.10 | +0.19      | +0.53      | +0.98      | +0.52      | +0.86      | +0.60      | +0.41      | +0.24 | +0.50      |
| F486                                              | +4.18                                 | +3.34      | +3.45      | +3.20      | $\pm 0.00$ | +4.41      | +2.05 | +2.51      | +3.48      | +2.21      | +2.09 | +3.26      | +3.46      | +2.88      | +2.50      | +3.90      | +3.24      | +3.13      | +0.87 | +0.82      |
| N487                                              | +0.42                                 | -1.78      | +1.39      | +2.62      | -2.27      | -0.12      | -0.83 | -1.11      | +2.05      | -1.06      | -1.38 | $\pm 0.00$ | +0.88      | +0.74      | +0.10      | +0.39      | +0.40      | -0.89      | -2.03 | -2.25      |
| C488                                              | +2.03                                 | $\pm 0.00$ | +2.49      | +2.74      | +0.30      | +2.23      | +1.19 | +1.06      | +2.25      | +0.99      | +0.83 | +2.08      | +3.53      | +1.55      | +1.53      | +1.90      | +2.02      | +1.33      | +0.46 | +0.40      |
| Y489                                              | +2.37                                 | +2.04      | +2.53      | +1.97      | +0.81      | +2.76      | +1.32 | +1.49      | +1.74      | 1.75       | +1.33 | +2.15      | +2.53      | +1.71      | +1.41      | +2.45      | +2.16      | +1.90      | +0.58 | $\pm 0.00$ |
| Q493                                              | +0.71                                 | +52        | 0.84       | +0.80      | -0.13      | +0.98      | +0.27 | +0.15      | +0.83      | +0.04      | +0.31 | +0.58      | +0.87      | $\pm 0.00$ | +0.63      | +1.02      | +0.47      | +0.22      | -0.07 | +0.11      |
| T500                                              | +0.17                                 | -0.02      | -0.15      | +0.12      | +0.19      | +0.26      | +0.10 | +0.26      | +0.12      | +0.14      | +0.17 | -0.09      | +0.33      | +0.20      | +0.18      | +0.03      | $\pm 0.00$ | +0.26      | +0.15 | +0.15      |
| N501                                              | +0.67                                 | +0.73      | +0.67      | +0.38      | +0.30      | +0.84      | +0.02 | +0.44      | +0.21      | +0.43      | +0.35 | $\pm 0.00$ | +0.68      | +0.21      | +0.18      | +0.79      | +0.09      | +0.46      | +0.25 | +0.19      |
| G502                                              | +1.59                                 | +0.92      | +1.91      | +2.50      | +0.19      | $\pm 0.00$ | +0.55 | +1.27      | +2.13      | +0.88      | +0.91 | +1.68      | +1.15      | +1.89      | +1.44      | +1.50      | +1.38      | +1.37      | +0.07 | +0.46      |
| V503                                              | +0.27                                 | +0.46      | +0.01      | +0.37      | +0.48      | +0.42      | +0.10 | +0.23      | +0.25      | +0.17      | +0.18 | +0.05      | -0.17      | +0.24      | +0.02      | +0.10      | +0.05      | $\pm 0.00$ | +0.25 | +0.36      |
| Y505                                              | +1.85                                 | +2.07      | +1.71      | +1.67      | +0.71      | +2.35      | +1.20 | +1.45      | +1.72      | +1.11      | +0.94 | +1.41      | +1.94      | +1.20      | +1.32      | +1.70      | +1.64      | +1.57      | +0.48 | $\pm 0.00$ |

a) no cumulative effects; free energy difference calculations for individual amino acid positions.

b) residues with a shortest atom distance below 5 Å between RBD and hDPP-IV.

**Table S3:** Comparative Analysis of HLA class I peptides from spike proteins from Omicron variants and strains. <sup>a,b,c)</sup>

|                      | HLA-A0101 | HLA-A0201 | HLA-A0301 | HLA-A2402 | HLA-B0702 | HLA-B0801 | HLA-B1503 | HLA-B3501 | HLA-B4001 | HLA-B4402 |
|----------------------|-----------|-----------|-----------|-----------|-----------|-----------|-----------|-----------|-----------|-----------|
| <b>Strong Binder</b> |           |           |           |           |           |           |           |           |           |           |
| EPI_ISL_402125       | 2         | 13        | 5         | 4         | 2         | 2         | 41        | 18        | 2         | 1         |
| EPI_ISL_6640916      | 2         | 12        | 5         | 4         | 2         | 2         | 38        | 17        | 2         | 1         |
| EPI_ISL_8414412      | 3         | 11        | 6         | 5         | 1         | 2         | 38        | 18        | 2         | 1         |
| EPI_ISL_8449977      | 3         | 11        | 6         | 5         | 1         | 2         | 38        | 18        | 2         | 1         |
| EPI_ISL_8546808      | 2         | 12        | 5         | 4         | 1         | 2         | 41        | 18        | 2         | 1         |
| <b>Medium Binder</b> |           |           |           |           |           |           |           |           |           |           |
| EPI_ISL_402125       | 4         | 25        | 18        | 10        | 10        | 15        | 94        | 34        | 5         | 4         |
| EPI_ISL_6640916      | 4         | 27        | 18        | 11        | 7         | 15        | 100       | 35        | 4         | 3         |
| EPI_ISL_8414412      | 3         | 26        | 18        | 9         | 8         | 16        | 102       | 33        | 4         | 3         |
| EPI_ISL_8449977      | 3         | 26        | 18        | 9         | 8         | 16        | 101       | 33        | 4         | 3         |
| EPI_ISL_8546808      | 3         | 24        | 18        | 9         | 9         | 15        | 96        | 33        | 5         | 4         |
| <b>Nonbinder</b>     |           |           |           |           |           |           |           |           |           |           |
| EPI_ISL_402125       | 1259      | 1227      | 1242      | 1251      | 1253      | 1248      | 1130      | 1213      | 1258      | 1260      |
| EPI_ISL_6640916      | 1256      | 1223      | 1239      | 1247      | 1253      | 1245      | 1124      | 1210      | 1256      | 1258      |
| EPI_ISL_8414412      | 1253      | 1222      | 1235      | 1245      | 1250      | 1241      | 1119      | 1208      | 1253      | 1255      |
| EPI_ISL_8449977      | 1253      | 1222      | 1235      | 1245      | 1250      | 1241      | 1120      | 1208      | 1253      | 1255      |
| EPI_ISL_8546808      | 1255      | 1224      | 1237      | 1247      | 1250      | 1243      | 1123      | 1209      | 1253      | 1255      |

- a) numbers of peptides with high, medium, or no binding affinity are listed as determined by the NetMHC 4.0 Server.
- b) HLA-B1503 has the highest number of strong and/or medium binding peptides.
- c) the lowest number of strong binding peptides is present in HLA-B4402.

**Table S4:** Determination of HLA peptide preferences depending on amino acids deleted in spike proteins from Omicron variants and strains. <sup>a,b)</sup>

| pos | EPI_ISL_402125 | EPI_ISL_6640916 | EPI_ISL_8414412 | EPI_ISL_8449977 | EPI_ISL_8546808 |   | amino acid sequence | EPI_ISL_402125 |           | EPI_ISL_6640916 |           | EPI_ISL_8414412 |           | EPI_ISL_8449977 |           | EPI_ISL_8546808 |           |                   |
|-----|----------------|-----------------|-----------------|-----------------|-----------------|---|---------------------|----------------|-----------|-----------------|-----------|-----------------|-----------|-----------------|-----------|-----------------|-----------|-------------------|
| 62  | V              | V               | V               | V               | V               | * | FFSNVTWFH           | 0,280          | HLA-B3501 | 0,280           | HLA-B3501 | 0,280           | HLA-B3501 | 0,280           | HLA-B3501 | 0,280           | HLA-B3501 | Deletion Region 1 |
| 63  | T              | T               | T               | T               | T               | * | FSNVTWFHA           | 0,350          | HLA-A0101 | 0,350           | HLA-A0101 | 0,415           | HLA-A0201 | 0,415           | HLA-A0201 | 0,350           | HLA-A0101 |                   |
| 64  | W              | W               | W               | W               | W               | * | SNVTWFHAI           | 0,279          | HLA-B1503 | 0,279           | HLA-B1503 | 0,324           | HLA-A2402 | 0,324           | HLA-A2402 | 0,279           | HLA-B1503 |                   |
| 65  | F              | F               | F               | F               | F               | * | NVTWFHAIH           | 0,251          | HLA-B3501 | 0,251           | HLA-B3501 | 0,143           | HLA-B3501 | 0,143           | HLA-B3501 | 0,149           | HLA-B3501 |                   |
| 66  | H              | H               | H               | H               | H               | * | VTWFHAIHV           | 0,509          | HLA-A0201 | 0,509           | HLA-A0201 | 0,214           | HLA-B1503 | 0,214           | HLA-B1503 | 0,229           | HLA-B1503 |                   |
| 67  | A              | A               | V               | V               | A               | . | TWFHAIHVS           | 0,181          | HLA-A2402 | 0,181           | HLA-A2402 | 0,088           | HLA-A0201 | 0,088           | HLA-A0201 | 0,088           | HLA-A2402 |                   |
| 68  | I              | I               | I               | I               | I               | * | WFHAIHVSG           | 0,152          | HLA-B0801 | 0,152           | HLA-B0801 | 0,126           | HLA-B3501 | 0,126           | HLA-B3501 | 0,168           | HLA-B3501 |                   |
| 69  | H              | H               | -               | -               | -               |   | FHAIHVSGT           | 0,100          | HLA-B1503 | 0,100           | HLA-B1503 |                 |           |                 |           |                 |           |                   |
| 70  | V              | V               | -               | -               | -               |   | HAIHVSGTN           | 0,389          | HLA-B3501 | 0,389           | HLA-B3501 |                 |           |                 |           |                 |           |                   |
| 71  | S              | S               | S               | S               | S               | * | AIHVSGTNG           | 0,115          | HLA-B1503 | 0,115           | HLA-B1503 | 0,164           | HLA-B1503 | 0,164           | HLA-B1503 | 0,133           | HLA-B1503 |                   |
| 72  | G              | G               | G               | G               | G               | * | IHVSGTNGT           | 0,084          | HLA-B1503 | 0,084           | HLA-B1503 | 0,284           | HLA-B3501 | 0,284           | HLA-B3501 | 0,413           | HLA-B3501 |                   |
| 73  | T              | T               | T               | T               | T               | * | HVSGTNGTK           | 0,477          | HLA-A0301 | 0,477           | HLA-A0301 | 0,489           | HLA-A0301 | 0,489           | HLA-A0301 | 0,501           | HLA-A0301 |                   |
| 74  | N              | N               | N               | N               | N               | * | VSGTNGTKR           | 0,120          | HLA-A0301 | 0,120           | HLA-A0301 | 0,135           | HLA-A0301 | 0,135           | HLA-A0301 | 0,135           | HLA-A0301 |                   |
| 75  | G              | G               | G               | G               | G               | * | SGTNGTKRF           | 0,365          | HLA-B1503 | 0,365           | HLA-B1503 | 0,365           | HLA-B1503 | 0,365           | HLA-B1503 | 0,365           | HLA-B1503 |                   |
| 76  | T              | T               | T               | T               | T               | * | GTNGTKRFD           | 0,047          | HLA-B4001 | 0,047           | HLA-B4001 | 0,047           | HLA-B4001 | 0,047           | HLA-B4001 | 0,047           | HLA-B4001 |                   |
| 137 | N              | N               | N               | N               | N               | * | FQFCNDPFL           | 0,795          | HLA-A0201 | 0,795           | HLA-A0201 | 0,795           | HLA-A0201 | 0,795           | HLA-A0201 | 0,795           | HLA-A0201 | Deletion Region 2 |
| 138 | D              | D               | D               | D               | D               | * | QFCNDPFLG           | 0,099          | HLA-A2402 | 0,085           | HLA-A2402 | 0,085           | HLA-A2402 | 0,085           | HLA-A2402 | 0,085           | HLA-A2402 |                   |
| 139 | P              | P               | P               | P               | P               | * | FCNDPFLGV           | 0,374          | HLA-A0201 | 0,265           | HLA-A0201 | 0,198           | HLA-B3501 | 0,198           | HLA-B3501 | 0,198           | HLA-B3501 |                   |
| 140 | F              | F               | F               | F               | F               | * | CNDPFLGVY           | 0,476          | HLA-A0101 | 0,492           | HLA-A0101 | 0,090           | HLA-A0301 | 0,090           | HLA-A0301 | 0,090           | HLA-A0301 |                   |
| 141 | L              | L               | L               | L               | L               | * | NDPFLGVYY           | 0,144          | HLA-B4402 | 0,167           | HLA-B3501 | 0,041           | HLA-B3501 | 0,041           | HLA-B3501 | 0,041           | HLA-B3501 |                   |
| 142 | G              | D               | -               | -               | -               |   | DPFLGVYYH           | 0,483          | HLA-B3501 | 0,446           | HLA-B3501 |                 |           |                 |           |                 |           |                   |
| 143 | V              | V               | -               | -               | -               |   | PFLGVYYHK           | 0,145          | HLA-A0301 | 0,114           | HLA-A0301 |                 |           |                 |           |                 |           |                   |
| 144 | Y              | Y               | -               | -               | -               |   | FLGVYYHKN           | 0,157          | HLA-B0801 | 0,172           | HLA-A0101 |                 |           |                 |           |                 |           |                   |
| 145 | Y              | Y               | D               | D               | D               |   | LGVYYHKNN           | 0,084          | HLA-B1503 | 0,058           | HLA-B1503 | 0,132           | HLA-B3501 | 0,132           | HLA-B3501 | 0,132           | HLA-B3501 |                   |
| 146 | H              | H               | H               | H               | H               | * | GVYYHKNNK           | 0,699          | HLA-A0301 | 0,371           | HLA-A0301 | 0,089           | HLA-A0301 | 0,089           | HLA-A0301 | 0,089           | HLA-A0301 |                   |
| 147 | K              | K               | K               | K               | K               | * | VYYHKNNKS           | 0,128          | HLA-B1503 | 0,128           | HLA-B1503 | 0,188           | HLA-A0201 | 0,188           | HLA-A0201 | 0,188           | HLA-A0201 |                   |
| 148 | N              | N               | N               | N               | N               | * | YYHKNNKSW           | 0,500          | HLA-A2402 | 0,500           | HLA-A2402 | 0,210           | HLA-B4402 | 0,210           | HLA-B4402 | 0,210           | HLA-B4402 |                   |
| 149 | N              | N               | N               | N               | N               | * | YHKNNKSWM           | 0,337          | HLA-B1503 | 0,337           | HLA-B1503 | 0,110           | HLA-B1503 | 0,110           | HLA-B1503 | 0,110           | HLA-B1503 |                   |

**Table S4** (continued)

| pos | EPI_ISL_402125 | EPI_ISL_6640916 | EPI_ISL_8414412 | EPI_ISL_8449977 | EPI_ISL_8546808 | amino acid<br>sequence | EPI_ISL_402125 |           | EPI_ISL_6640916 |           | EPI_ISL_8414412 |           | EPI_ISL_8449977 |           | EPI_ISL_8546808 |           |
|-----|----------------|-----------------|-----------------|-----------------|-----------------|------------------------|----------------|-----------|-----------------|-----------|-----------------|-----------|-----------------|-----------|-----------------|-----------|
| 208 | T              | T               | T               | T               | T               | * YSKHTPINL            | 0,546          | HLA-B1503 | 0,546           | HLA-B1503 | 0,488           | HLA-B1503 | 0,488           | HLA-B1503 | 0,546           | HLA-B1503 |
| 209 | P              | P               | P               | P               | P               | * SKHTPINLV            | 0,475          | HLA-B1503 | 0,245           | HLA-B1503 | 0,295           | HLA-B1503 | 0,295           | HLA-B1503 | 0,475           | HLA-B1503 |
| 210 | I              | I               | I               | I               | I               | * KHTPINLVR            | 0,131          | HLA-A0301 | 0,119           | HLA-A0301 | 0,046           | HLA-B0702 | 0,046           | HLA-B0702 | 0,131           | HLA-A0301 |
| 211 | N              | N               | -               | -               | N               | HTPINLVRD              | 0,052          | HLA-B4001 | 0,052           | HLA-B4001 |                 |           |                 |           | 0,052           | HLA-B4001 |
| 212 | L              | L               | I               | I               | L               | : TPINLVRDL            | 0,509          | HLA-B0702 | 0,656           | HLA-B0702 | 0,092           | HLA-A0201 | 0,092           | HLA-A0201 | 0,509           | HLA-B0702 |
| 213 | V              | G               | V               | V               | V               | PINLVRDLP              | 0,054          | HLA-A0101 | 0,046           | HLA-A0101 | 0,161           | HLA-B3501 | 0,161           | HLA-B3501 | 0,054           | HLA-A0101 |
| 214 | R              | R               | R               | R               | R               | * INLVRDLPQ            | 0,117          | HLA-B1503 | 0,085           | HLA-B0801 | 0,075           | HLA-B1503 | 0,075           | HLA-B1503 | 0,117           | HLA-B1503 |
| 215 | D              | D               | D               | D               | D               | * NLVRDLPQG            | 0,085          | HLA-A0201 | 0,075           | HLA-A0201 | 0,067           | HLA-B3501 | 0,067           | HLA-B3501 | 0,085           | HLA-A0201 |
| 216 | L              | L               | L               | L               | L               | * LVRDLPQGF            | 0,480          | HLA-B1503 | 0,532           | HLA-B1503 | 0,448           | HLA-B1503 | 0,448           | HLA-B1503 | 0,480           | HLA-B1503 |
| 217 | P              | P               | P               | P               | P               | * VRDLPQGFS            | 0,036          | HLA-A0101 | 0,033           | HLA-B4001 | 0,036           | HLA-A0101 | 0,036           | HLA-A0101 | 0,036           | HLA-A0101 |
| 218 | Q              | Q               | Q               | Q               | Q               | * RDLPQGFSA            | 0,226          | HLA-B1503 | 0,226           | HLA-B1503 | 0,226           | HLA-B1503 | 0,226           | HLA-B1503 | 0,226           | HLA-B1503 |

Deletion Region 3

- a) single point mutations (yellow) and deletions (red) are highlighted in the first 6 columns  
b) binding affinity is color coded yellow (medium: 0.43 – 0.64) or green (strong: >0.64)



**Table S5:** HLA Peptide preferences depending on single point mutations in spike proteins of Omicron variants and strains. <sup>a,b,c,d)</sup>

| Pos | EPI_ISL_402125 | EPI_ISL_6640916 | EPI_ISL_8414412 | EPI_ISL_8449977 | EPI_ISL_8546808 | amino acid<br>sequence | EPI_ISL_402125 | EPI_ISL_6640916 | EPI_ISL_8414412 | EPI_ISL_8449977 | EPI_ISL_8546808 |           |       |           |       |           |
|-----|----------------|-----------------|-----------------|-----------------|-----------------|------------------------|----------------|-----------------|-----------------|-----------------|-----------------|-----------|-------|-----------|-------|-----------|
| 501 | N              | Y               | Y               | Y               | N               | FQPTNGVGY              | 0,753          | HLA-B1503       | 0,169           | HLA-B1503       | 0,169           | HLA-B1503 | 0,169 | HLA-B1503 | 0,753 | HLA-B1503 |
| 684 | A              | A               | A               | A               | A               | * SPRRARSVA            | 0,867          | HLA-B0702       | 0,231           | HLA-B0702       | 0,231           | HLA-B0702 | 0,231 | HLA-B0702 | 0,231 | HLA-B0702 |
| 496 | G              | G               | S               | S               | G               | . LQSYGFQPT            | 0,717          | HLA-B1503       | 0,235           | HLA-B1503       | 0,376           | HLA-B1503 | 0,376 | HLA-B1503 | 0,717 | HLA-B1503 |
| 146 | H              | H               | H               | H               | H               | * GVYYHKNNK            | 0,699          | HLA-A0301       | 0,371           | HLA-A0301       | 0,089           | HLA-A0301 | 0,089 | HLA-A0301 | 0,089 | HLA-A0301 |
| 491 | P              | P               | P               | P               | P               | * NCYFPLQSY            | 0,645          | HLA-B1503       | 0,498           | HLA-B1503       | 0,498           | HLA-B1503 | 0,498 | HLA-B1503 | 0,645 | HLA-B1503 |
| 421 | Y              | Y               | Y               | Y               | Y               | * KIADYNYKL            | 0,669          | HLA-A0201       | 0,539           | HLA-A0201       | 0,539           | HLA-A0201 | 0,539 | HLA-A0201 | 0,669 | HLA-A0201 |
| 338 | F              | F               | F               | F               | F               | * NLCPFGEVF            | 0,671          | HLA-B1503       | 0,574           | HLA-B1503       | 0,574           | HLA-B1503 | 0,574 | HLA-B1503 | 0,671 | HLA-B1503 |
| 509 | R              | R               | R               | R               | R               | * YQPYRVVVL            | 0,691          | HLA-B1503       | 0,599           | HLA-B1503       | 0,599           | HLA-B1503 | 0,599 | HLA-B1503 | 0,691 | HLA-B1503 |
| 412 | P              | P               | P               | P               | P               | * RQIAPGQTG            | 0,713          | HLA-B1503       | 0,602           | HLA-B1503       | 0,713           | HLA-B1503 | 0,713 | HLA-B1503 | 0,713 | HLA-B1503 |
| 376 | T              | A               | T               | T               | T               | : ASFSTFKCY            | 0,755          | HLA-B1503       | 0,634           | HLA-B3501       | 0,621           | HLA-B3501 | 0,621 | HLA-B3501 | 0,755 | HLA-B1503 |
| 856 | N              | N               | K               | K               | K               | : AQKFNGLTV            | 0,668          | HLA-B1503       | 0,668           | HLA-B1503       | 0,618           | HLA-B1503 | 0,618 | HLA-B1503 | 0,618 | HLA-B1503 |
| 980 | I              | I               | I               | I               | I               | * VLNDILSRL            | 0,675          | HLA-A0201       | 0,675           | HLA-A0201       | 0,620           | HLA-A0201 | 0,620 | HLA-A0201 | 0,620 | HLA-A0201 |
| 798 | G              | G               | G               | G               | G               | * IKDFGGFNF            | 0,592          | HLA-B1503       | 0,836           | HLA-B1503       | 0,836           | HLA-B1503 | 0,836 | HLA-B1503 | 0,836 | HLA-B1503 |
| 371 | S              | F               | L               | L               | S               | VLYNSASF               | 0,425          | HLA-B1503       | 0,838           | HLA-B1503       | 0,795           | HLA-B1503 | 0,795 | HLA-B1503 | 0,425 | HLA-B1503 |
| 497 | F              | F               | F               | F               | F               | * QSYGFQPTN            | 0,160          | HLA-B1503       | 0,815           | HLA-B1503       | 0,872           | HLA-B1503 | 0,872 | HLA-B1503 | 0,160 | HLA-B1503 |
| 447 | G              | G               | G               | G               | G               | * SKVGGNYNY            | 0,623          | HLA-B1503       | 0,623           | HLA-B1503       | 0,767           | HLA-B1503 | 0,767 | HLA-B1503 | 0,623 | HLA-B1503 |
| 374 | F              | F               | F               | F               | F               | * NSASFSTFK            | 0,576          | HLA-A0301       | 0,325           | HLA-A0301       | 0,680           | HLA-A0301 | 0,680 | HLA-A0301 | 0,576 | HLA-A0301 |
| 207 | H              | H               | H               | H               | H               | * IYSKHTPIN            | 0,242          | HLA-A2402       | 0,242           | HLA-A2402       | 0,675           | HLA-A2402 | 0,675 | HLA-A2402 | 0,242 | HLA-A2402 |
| 343 | N              | N               | N               | N               | N               | * GEVFNATRF            | 0,635          | HLA-B4001       | 0,265           | HLA-B4402       | 0,265           | HLA-B4402 | 0,265 | HLA-B4402 | 0,635 | HLA-B4001 |

- a) predictions calculated online with NetMHC 4.0  
b) peptide-lengths: 9mer  
c) single point mutations as compared to wild type (EPI\_ISL\_402125) are highlighted in the first 6 columns  
d) binding affinity is color coded yellow (medium: 0.43-0.64) or green (strong: >0.64)
